# Supplementary material for: Simultaneous tuning of optical and electrical properties in a multifunctional LiNbO3 matrix upon doping with Eu3+ ions
Source: Royal Society of Chemistry journal article supplement (doi:10.1039/d0ra01869d), 2020-01-01
Supplement: d0ra01869d1.pdf [file d0ra01869d1.pdf]

## Supporting Information

### Simultaneous tuning of optical and electrical properties in multifunctional LiNbO<sub>3</sub> matrix upon doping with Eu<sup>3+</sup> ion

Nimai Pathak<sup>a\*</sup>, Partha Sarathi Ghosh<sup>b</sup>, Sumanta Mukherjee<sup>c</sup>, Balaji Prasad Mandal<sup>d</sup>

<sup>a</sup> Radiochemistry Division, Bhabha Atomic Research Centre, Mumbai, 400085, India

<sup>b</sup> Glass and Advanced Materials Division, Bhabha Atomic Research Centre, Mumbai, 400085, India

<sup>c</sup> Fuel Chemistry Division, Bhabha Atomic Research Centre, Mumbai, 400085, India

<sup>d</sup> Chemistry Division, Bhabha Atomic Research Centre, Mumbai, 400085, India

\*Email: [nmpathak4@gmail.com](mailto:nmpathak4@gmail.com), [nimai@barc.gov.in](mailto:nimai@barc.gov.in)

Telephone- +91-22-25590715/0636

Fax- +91-22-25405151

#### 1.0. Instrumentation:

All the compounds were characterized with a rotating anode based powder X-ray diffractometer procured from Rigaku, Japan using CuK<sub>α</sub> ( $\lambda = 1.5406$  and  $1.5444\text{Å}$ ) monochromatic radiation. For FTIR study, a Platinum ATR (by Bruker alpha, Single reflection Diamond crystal, all reflective, gold coated optics, no fragile composite material construction) within the spectral range 5000-500 cm<sup>-1</sup> was used. Ferroelectric properties were investigated by using aix ACCT's TF analyser 2000. PL study has been carried out using an Edinburgh CD-920 unit equipped with M 300 monochromators and the data acquisition and analysis were carried with the help of F-900 software provided by Edinburgh Analytical Instruments, UK. The lifetime study was carried out based on the well established Time-correlated single-photon counting (TCSPC) technique.

#### 2.0. DFT calculation methodology

Electronic structure calculations of ideal LiNbO<sub>3</sub>, ferroelectric LiNbO<sub>3</sub> structure with oxygen, Li, Nb and antisite defects structures and as well as Eu doping in LiNbO<sub>3</sub> (LNO) were performed using a spin-polarized plane wave based density functional theory (DFT) simulations as implemented in Vienna Ab-initio Simulation package (VASP) [1, 2]. Projector augmented wave (PAW) potentials [3] were used to describe electron-ion interactions which includes the valence states of Li (2s<sup>2</sup> 2p<sup>1</sup> - 3 valence electrons), Nb (4s<sup>2</sup> 4p<sup>6</sup> 5s<sup>2</sup> 4d<sup>3</sup> - 13 valence electrons), O (2s<sup>2</sup> 2p<sup>4</sup> - 6 valence electrons) and Eu (5s<sup>2</sup> 5p<sup>6</sup> 4f<sup>7</sup> 6s<sup>2</sup> - 17 valence electrons). Exchange-correlation potential was described through generalized gradient approximation

(GGA) parameterized by Perdew-Burke-Ernzerhof (PBE) functional [4]. A 12x12x4 and 6x6x2 Monkhorst-Pack [5] k-space mesh was used for the Brillouin zone integration for 30 atom unitcell and 120 atom supercell, respectively. A cutoff energy ( $E_{\text{cut}}$ ) of 500 eV was used for the plane wave basis set throughout the simulation. The optimized  $E_{\text{cut}}$  and k-point meshes used for the simulations ensure convergence of total energy to within a precision 0.01 meV/atom for ideal and defective unit-cell/supercell. Conjugate gradient algorithm was used to optimize volumes (or lattice parameter) and atomic positions in ideal/defective supercells until the residual forces and stress in the equilibrium geometry were of the order of 0.005 eV/Å and 0.01 GPa, respectively. The final calculations of total electronic energy and density of states (DOS) were performed using the tetrahedron method with Blöchl corrections [6].

1. G. Kresse, J. Furthmüller, *Phys. Rev. B*, 1996, 54, 11169.
2. G. Kresse, J. Furthmüller, *Comput. Mater. Sci.*, 1996, 6, 15-50.
3. P.E. Blöchl, *Phys. Rev. B*, 1994, 50, 17953.
4. J.P. Perdew, K. Burke, M. Ernzerhof, *Phys. Rev. Lett.*, 1996, 77, 3865.
5. H.J. Monkhorst, J.D. Pack, *Phys. Rev. B*, 1976, 13(12), 5188.
6. P.E. Blöchl, O. Jepsen, O.K. Andersen, *Phys. Rev. B*, 1994, 49(23), 16223.

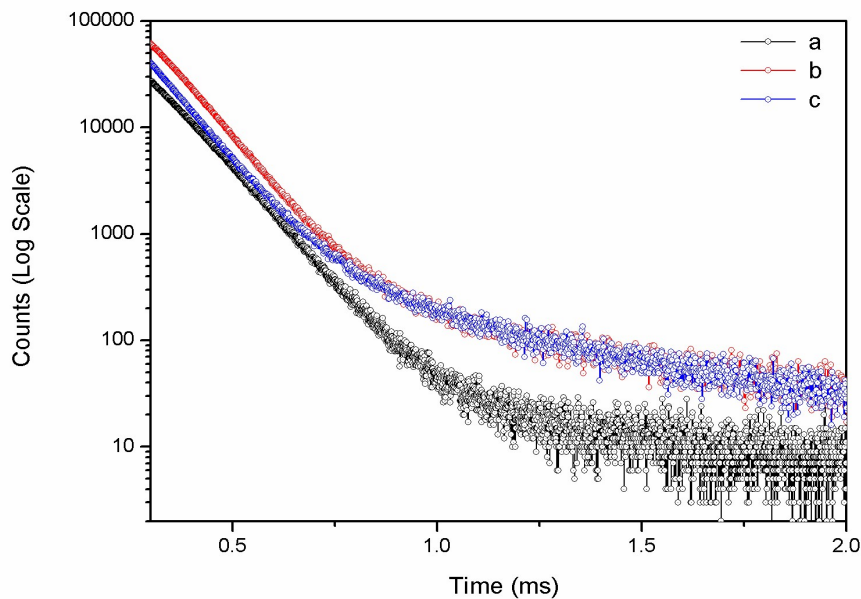

**Figure S1:** Luminescence decay time profile of undoped LNO: Eu<sup>3+</sup> at  $\lambda_{\text{ex}} = 230$  nm with (a)  $\lambda_{\text{em}} = 380$  nm , b)  $\lambda_{\text{em}} = 440$  nm and c)  $\lambda_{\text{em}} = 540$  nm

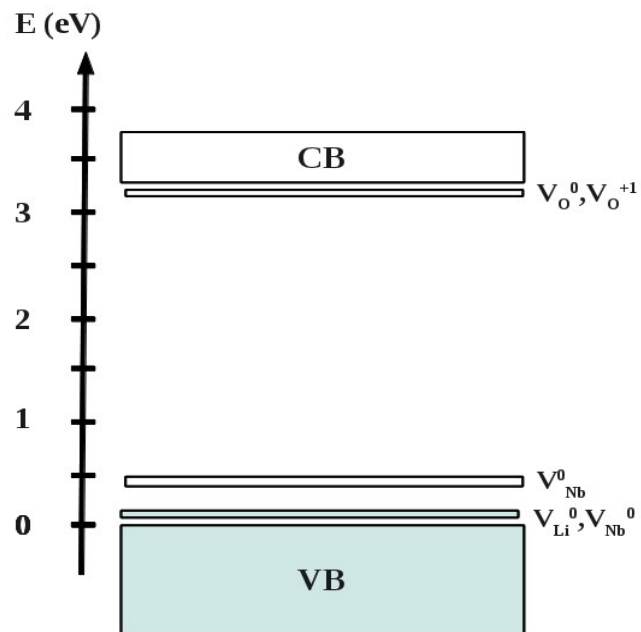

**Figure S2.** Defect related impurity states inside the band gap of LNO
